# Supplementary material
Source: PubMed Central journal article supplement (PMC5884729)
Supplement: NIHMS944438-supplement.pdf [file NIHMS944438-supplement.pdf]

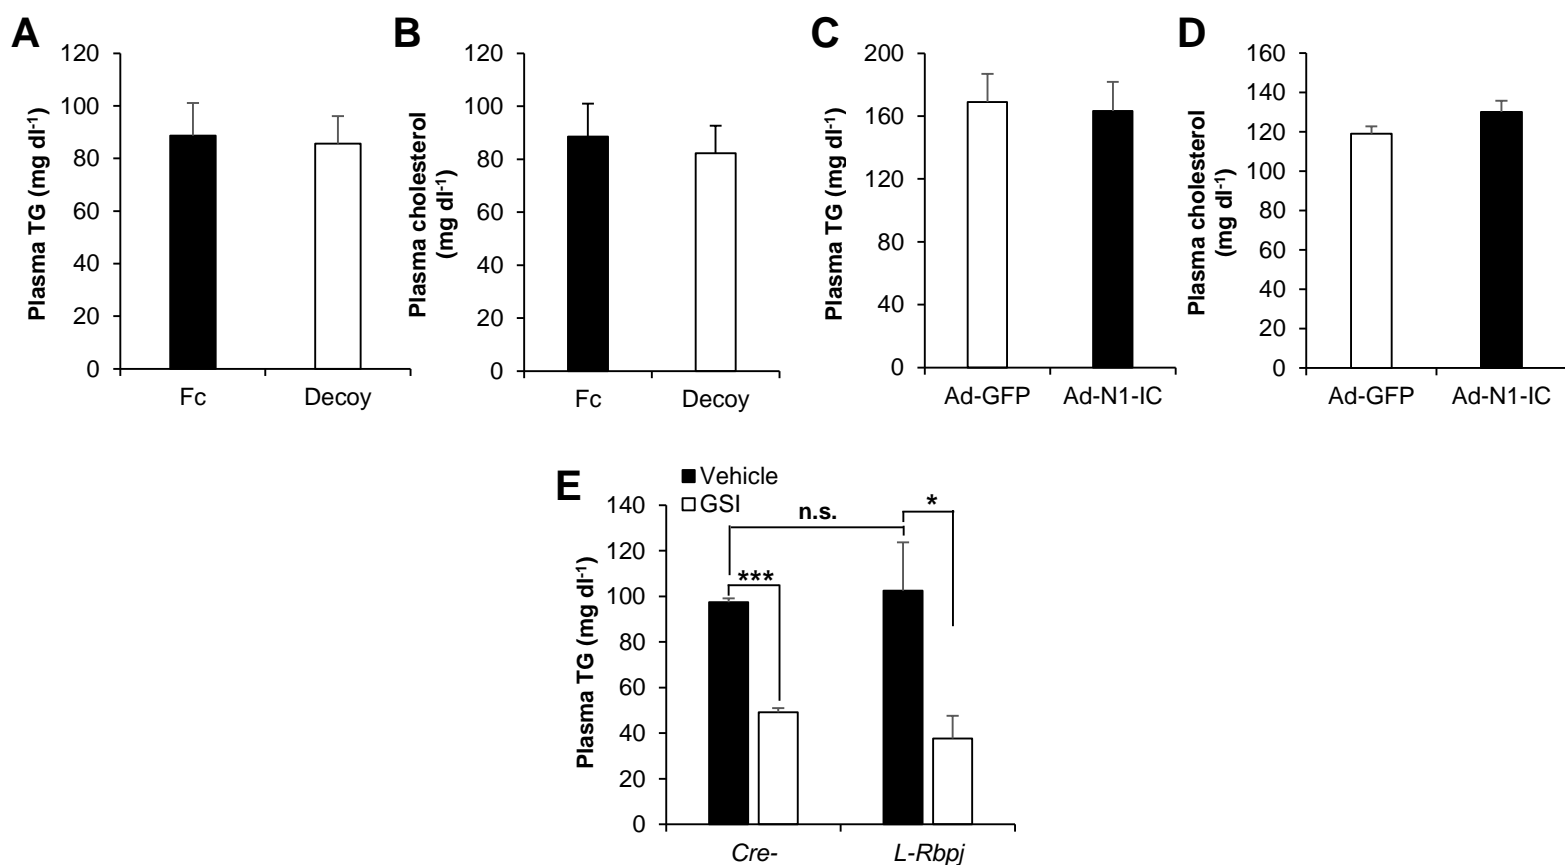

**Figure S1, related to Fig 1. Hepatic Notch activity does not affect plasma lipids.** (A-D) Plasma TG and cholesterol levels in C57BL/6 mice transduced with adenoviruses encoding either Ad-Fc control or Ad-Notch1 decoy (A and B) (n=5-6 per group) or Ad-GFP or constitutively-active Notch1 (Ad-N1-IC) (C and D) (n=5 per group). (E) Plasma TG levels in Cre- and *L-Rbpj* mice treated with vehicle or GSI (n=4 per group). \**P* < 0.05, \*\*\**P* < 0.001 as compared to the indicated control by two-way ANOVA. All data are shown as the means  $\pm$  s.e.m.

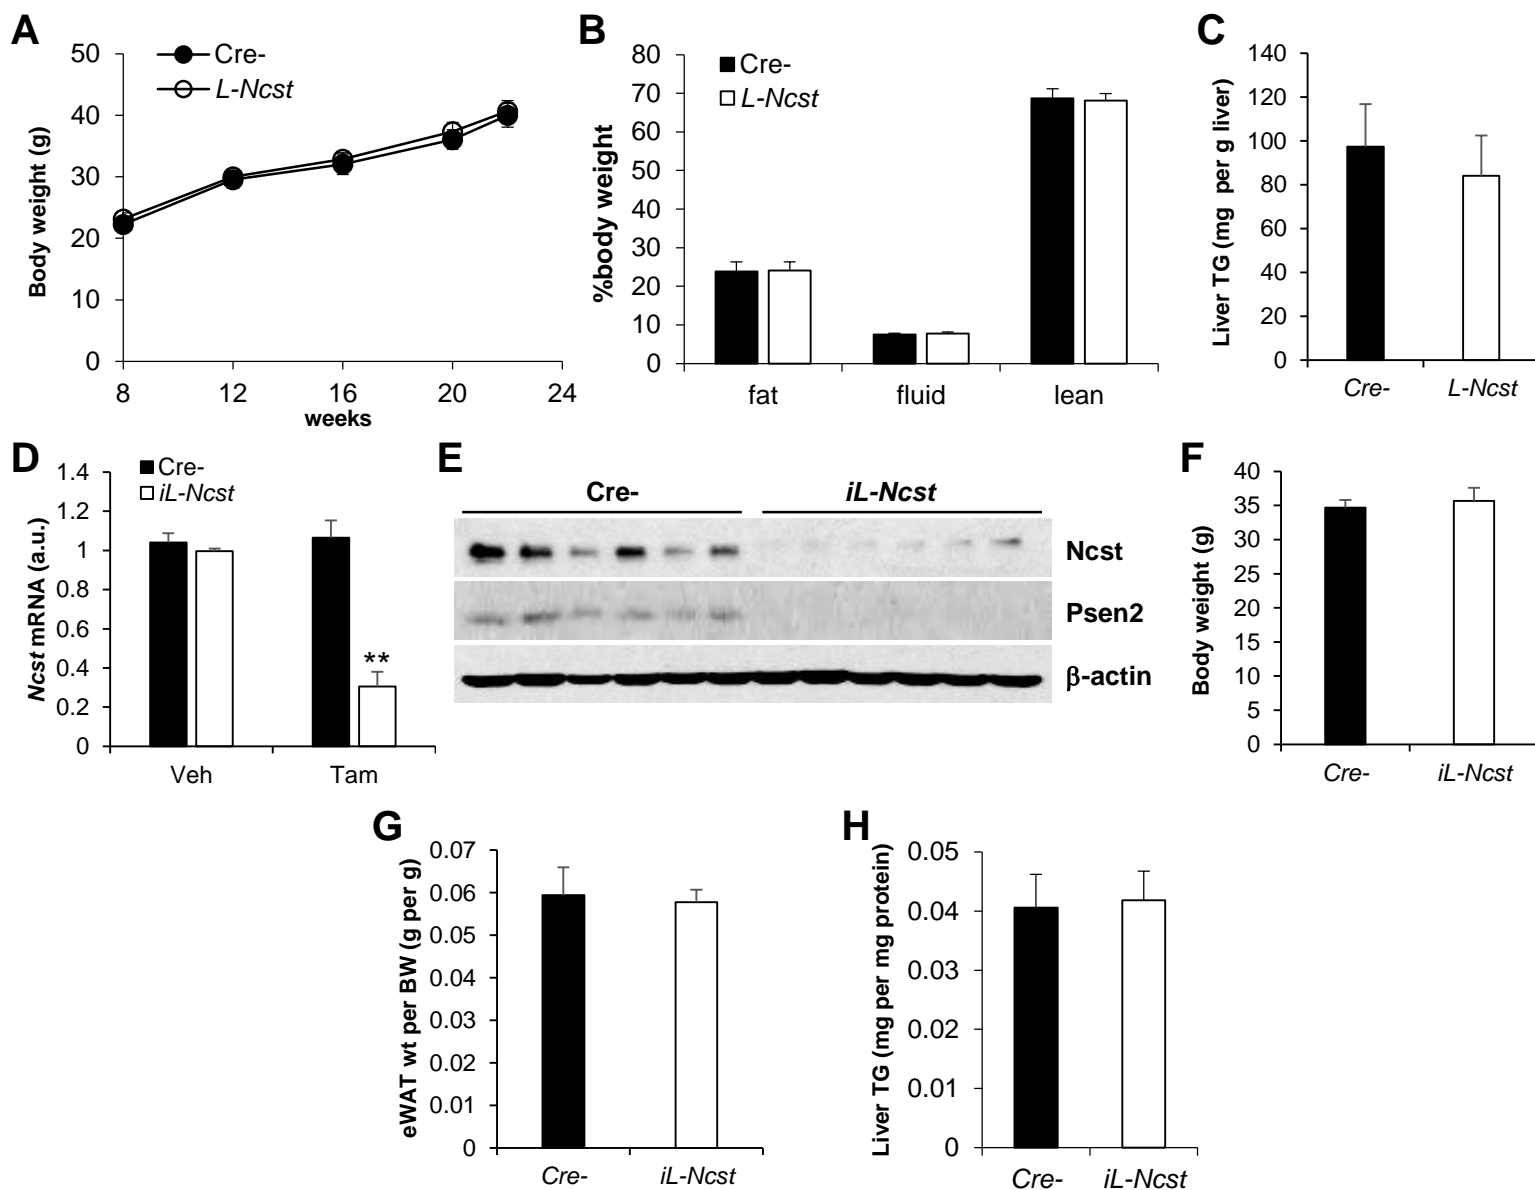

**Figure S2, related to Fig 2. Hepatocyte-specific  $\gamma$ -secretase knockout mice do not have differences in body composition and liver TG.** (A-C) Body weight (A), body composition (B) and liver TG (C) in Cre- or *L-Ncst* mice (n=6 per group). (D-F) Hepatic *Ncst* mRNA (D) and western blot for *Ncst* and *Psen2* (E), and body weight (F), epididymal white adipose tissues (eWAT) weight (G), or liver TG (H) in tamoxifen-treated Cre- or *iL-Ncst* mice (n=6 per group). \*\* $P < 0.01$  as compared to the indicated control by two-way ANOVA. All data are shown as the means  $\pm$  s.e.m.

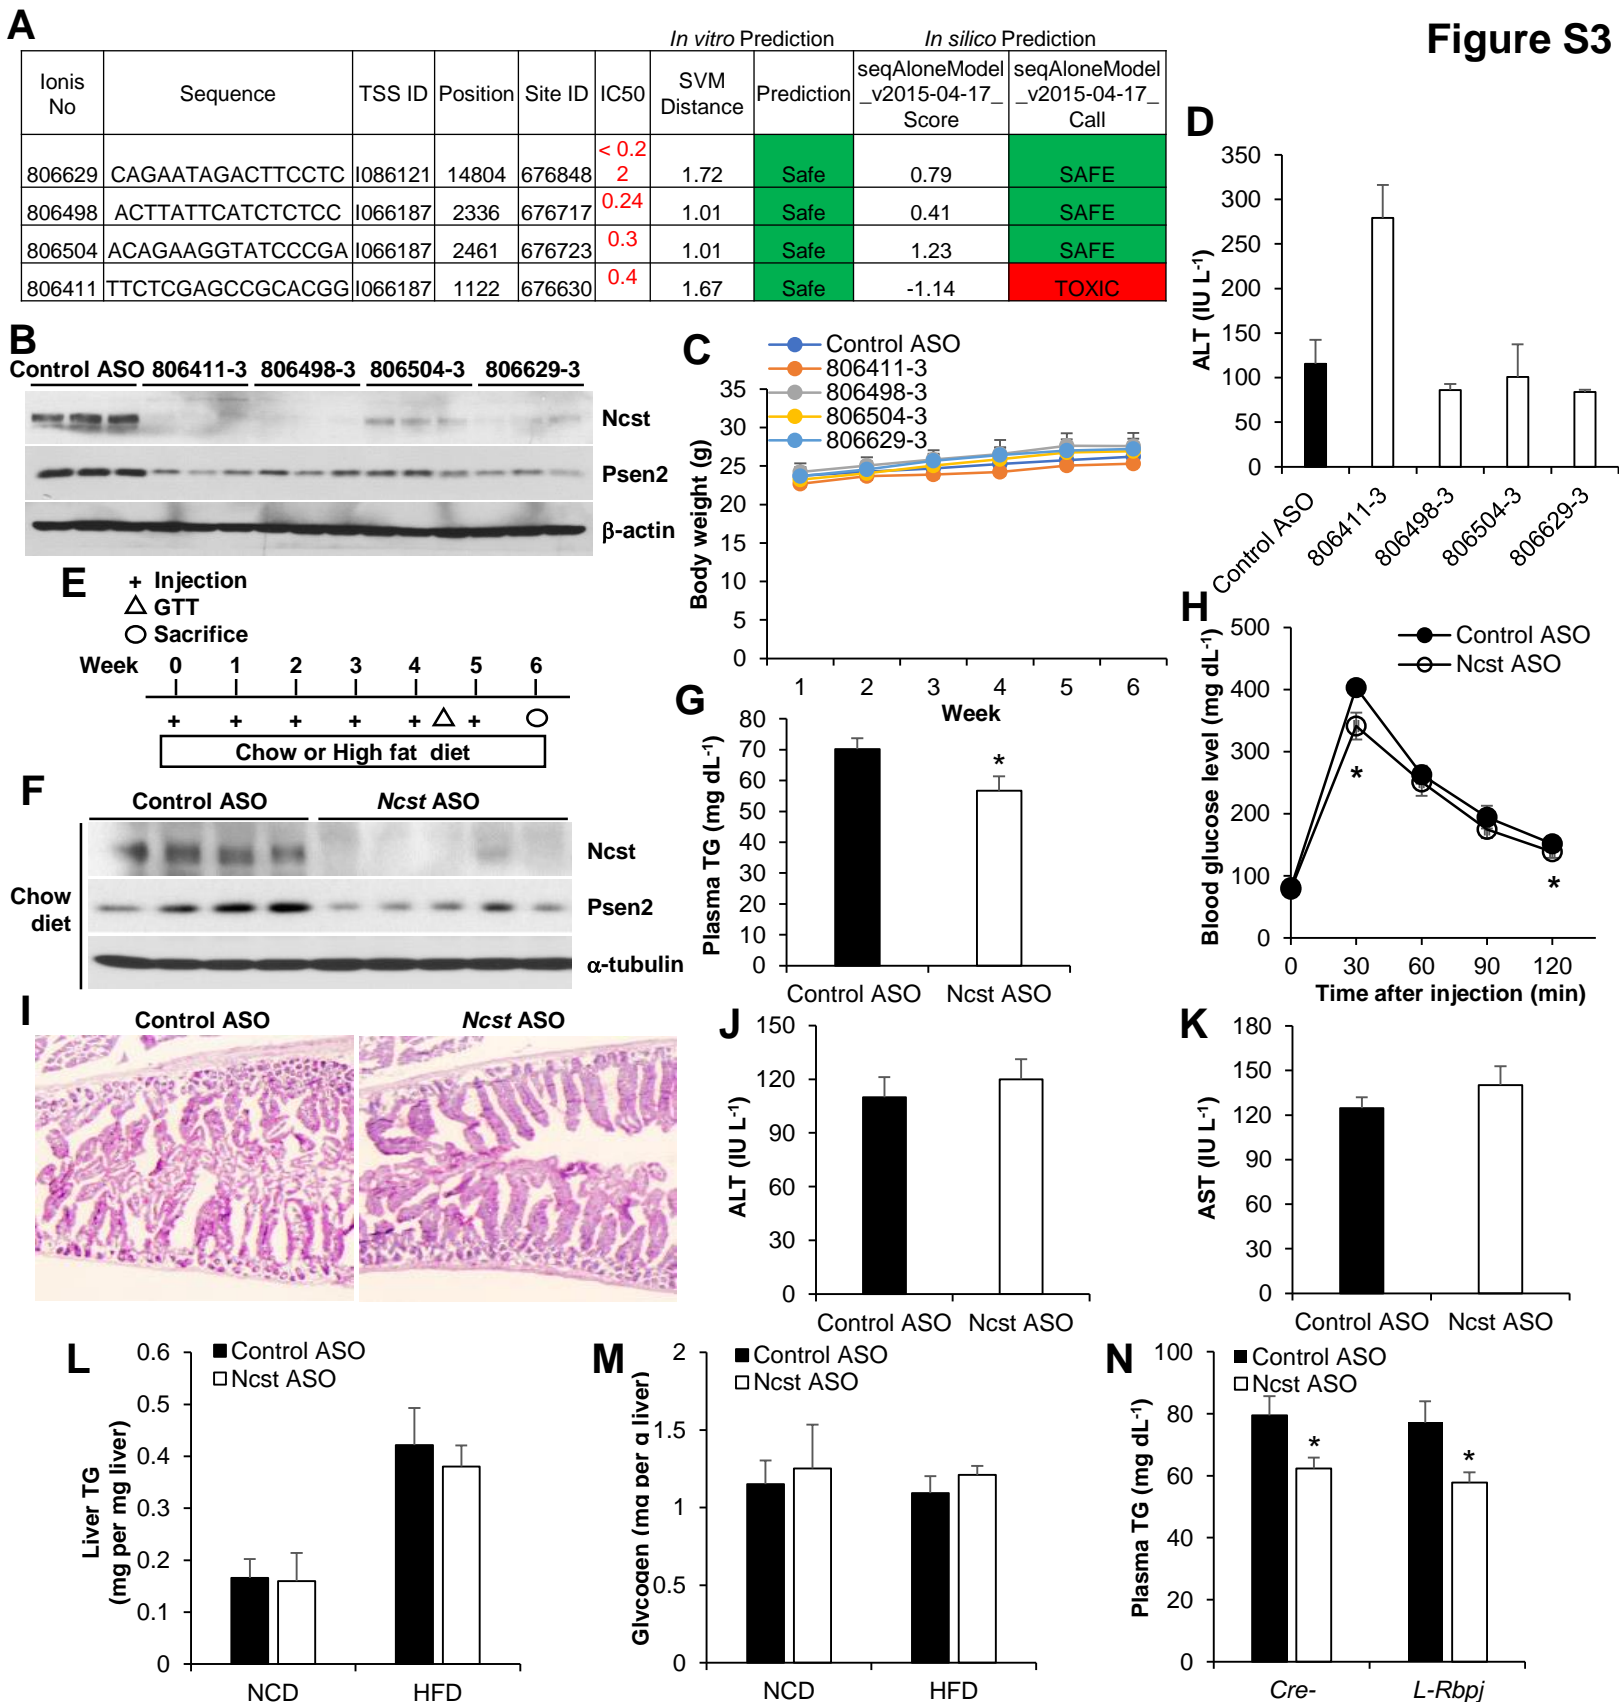

**Figure S3, related to Fig 3. *Ncst* ASO reduces plasma TG, independent of liver Notch activity, without apparent toxicity.** (A) Top leads for ASO directed against *Ncst*, based on *in vitro* efficacy and *in silico* predictions of toxicity. (B-D) Representative Western blots for liver *Ncst* and *Psen2* (B), body weight curves during ASO administration (C) and plasma ALT (D) in C57BL/6 mice administered control and target ASOs. (E-M) Experimental outline (E), liver *Ncst* and *Psen2* protein levels (F), plasma TG (G), glucose tolerance test (H), Periodic acid-Schiff (PAS) staining of small intestine (I), plasma ALT (J), AST (K) in chow-fed C57BL/6 mice, and liver TG (L) and glycogen (M) levels in chow- or HFD-fed C57BL/6 mice treated for 6 weeks with control or *Ncst* ASO ( $n=6-7$  per group). (N) Plasma TG in *Cre-* and *L-Rbpj* mice treated for 6 weeks with control or *Ncst* ASO ( $n=6$  per group). \* $P < 0.05$  as compared to the indicated control by two-way ANOVA. All data are shown as the means  $\pm$  s.e.m.

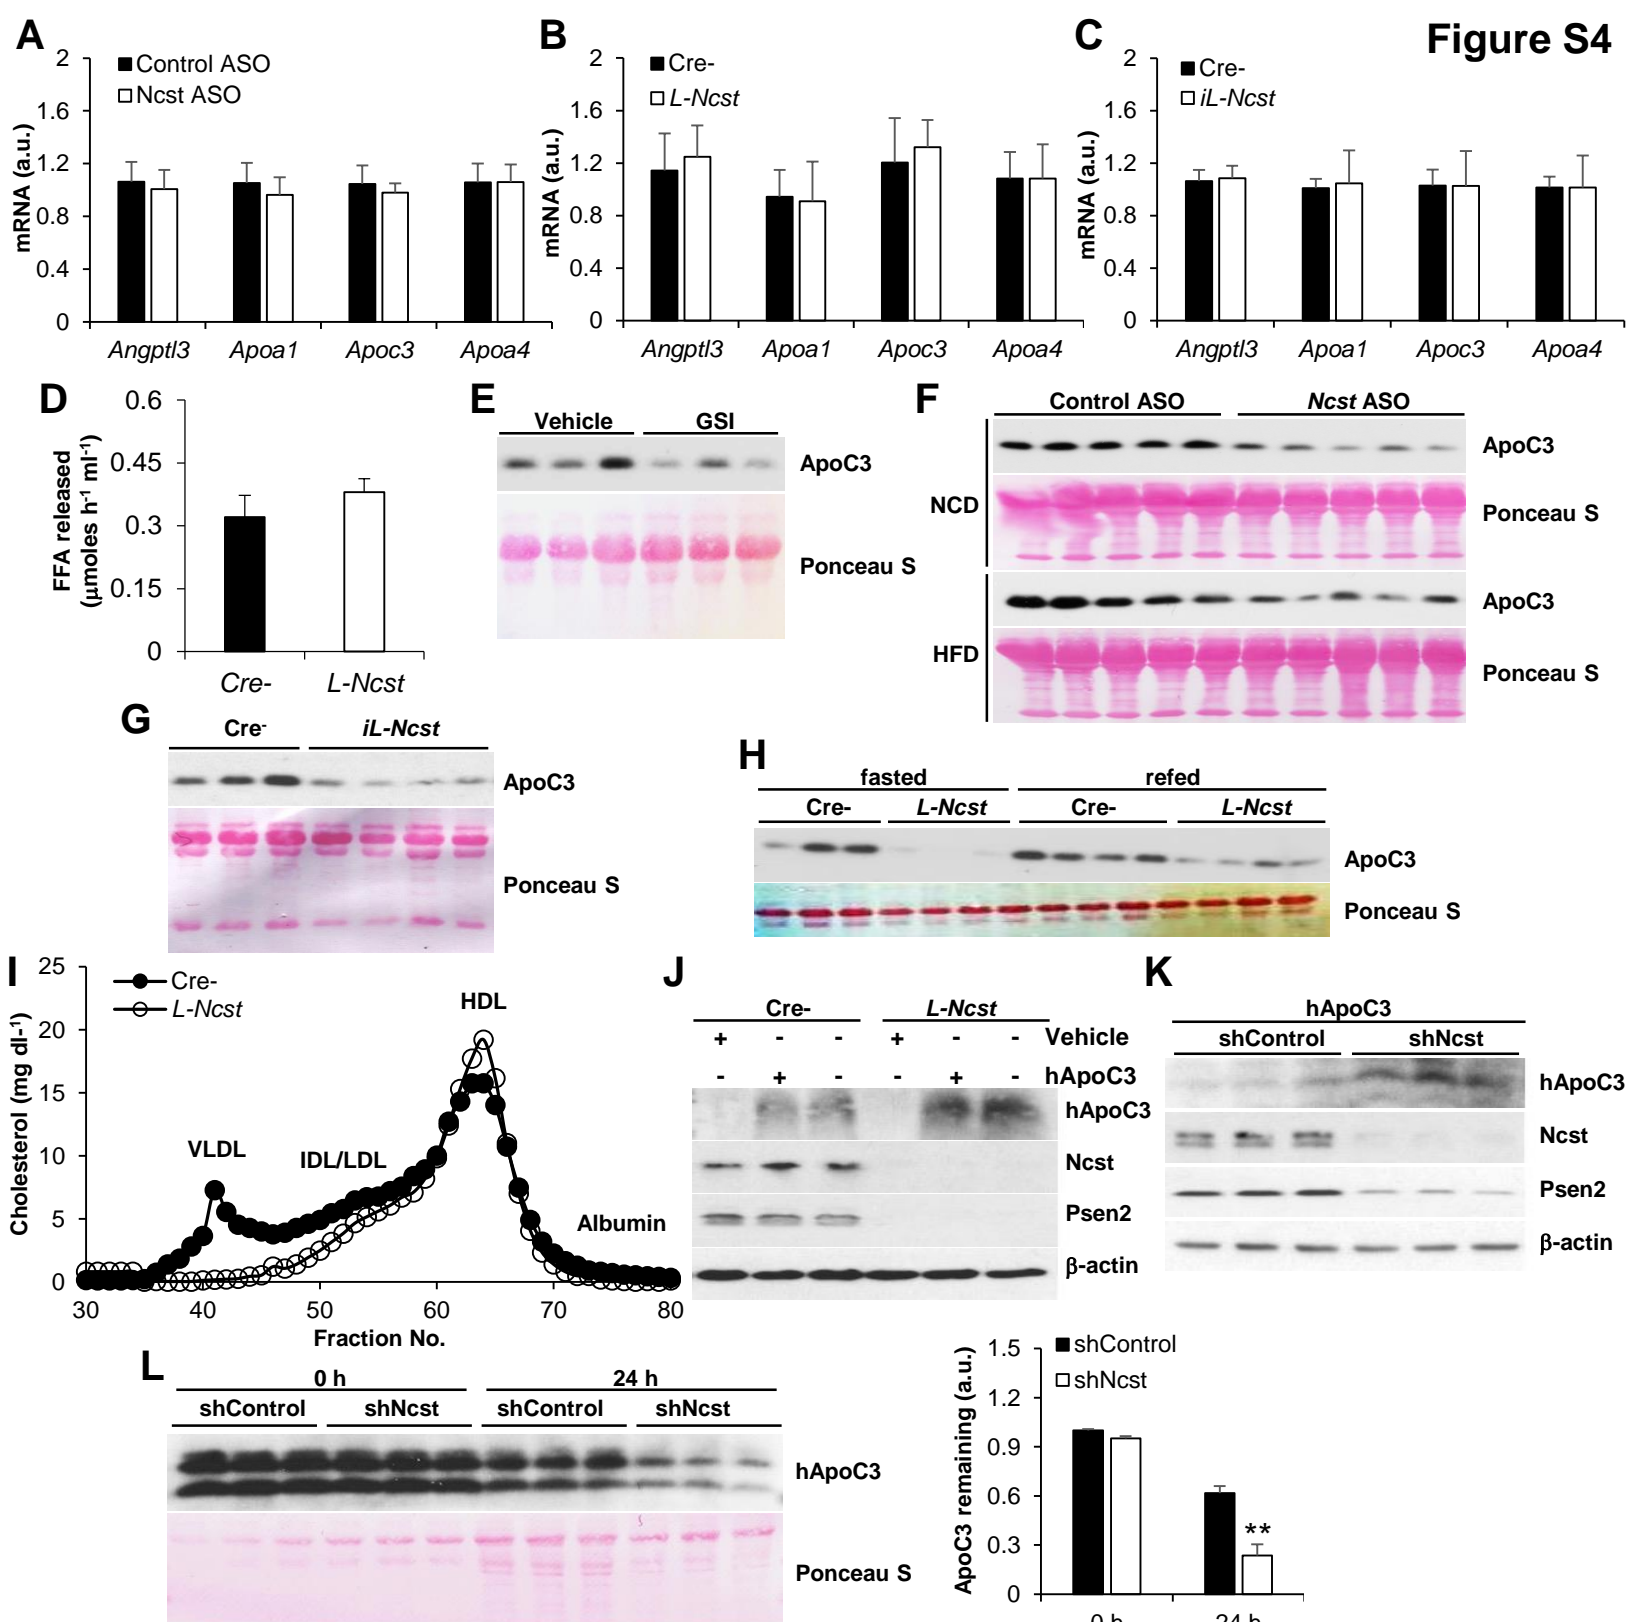

**Figure S4, related to Fig 4.  $\gamma$ -secretase inhibition lowers plasma ApoC3 and induces the clearance of TRLs.** (A-C) Liver gene expression in control- or *Ncst* ASO-treated (A), Cre- or *L-Ncst* (B) or tamoxifen-treated Cre- or *iL-Ncst* mice (C) ( $n=6-7$  per group). (D) Lipoprotein lipase (LPL) activity in plasma from Cre- or *L-Ncst* mice ( $n=6-7$  per group). (E-G) Representative Western blots of plasma ApoC3 in vehicle- or GSI-treated (E), control- or *Ncst* ASO-treated (F), tamoxifen-treated Cre- or *iL-Ncst* mice (G). (H) Western blots of ApoC3 in plasma from Cre- or *L-Ncst* mice, sacrificed after a 16 h fast followed by 4 h refeeding ( $n=6$  per group). (I) Lipoprotein cholesterol profiles in plasma from Cre- or *L-Ncst* mice analyzed by FPLC ( $n=6$  per group). (J and K) Western blots for intracellular human ApoC3 (hApoC3) in primary hepatocytes isolated from Cre- or *L-Ncst* mice (J) and shControl or shNcst-stable McA-RH7777 cells (K) incubated with hApoC3-containing plasma in the presence of MG-132 and chloroquine. (L) Western blot of starting (0 h) and remaining (24 h) hApoC3 in media of shControl or shNcst-stable McA-RH7777 cells (left), with quantitation relative to time 0 (right). \*\* $P < 0.01$  as compared to the indicated control by two-way ANOVA. All data are shown as the means  $\pm$  s.e.m.

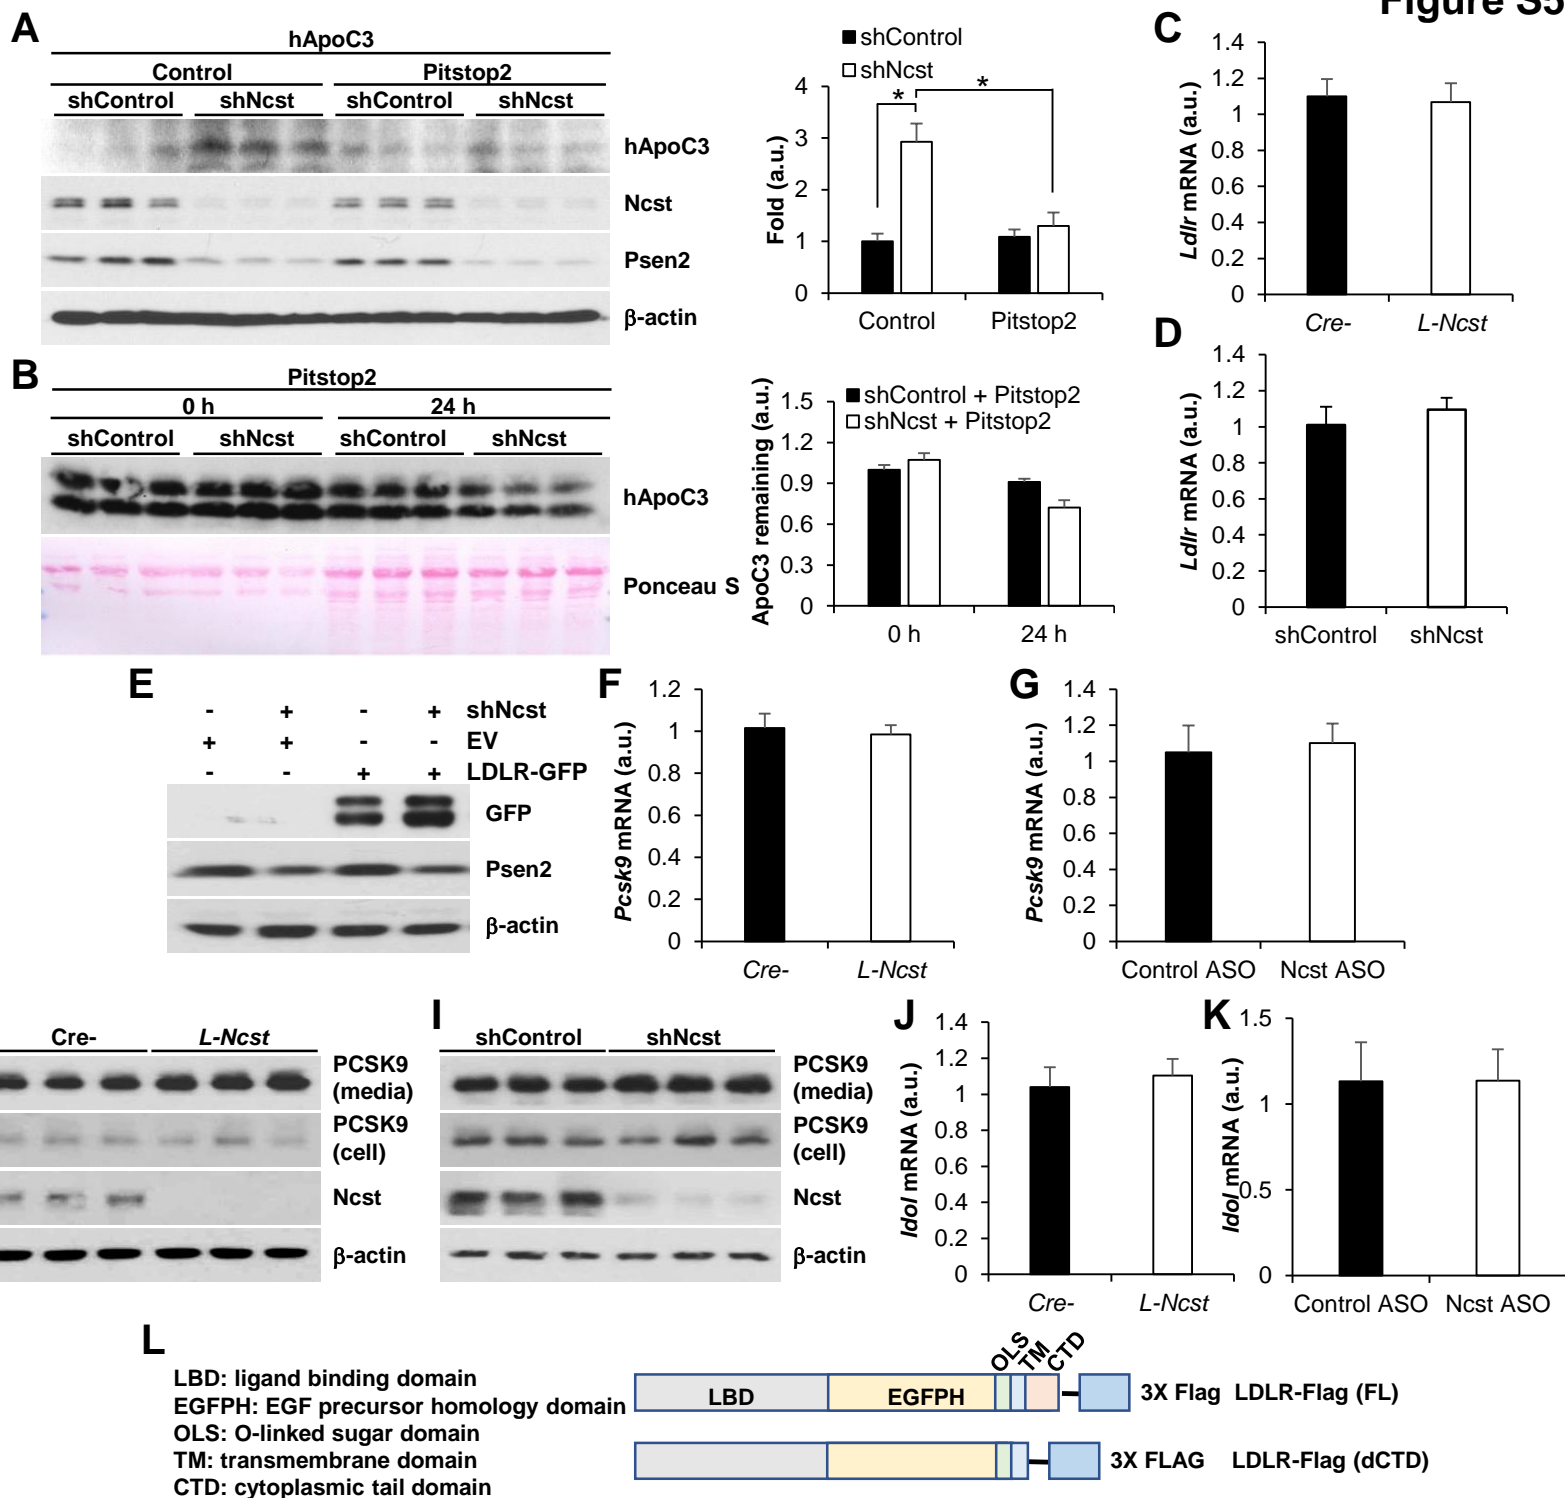

**Figure S5, related to Fig 5.  $\gamma$ -secretase inhibition induces ApoC3 uptake and stabilizes LDLR protein, but does not affect *Pcsk9* or *Idol*.** (A) Western blots for intracellular hApoC3 levels in shControl or shNcst-stable McA-RH7777 cells, incubated with hApoC3-containing plasma in the presence of MG-132 and chloroquine, with or without Pitstop2, with quantitation of intracellular hApoC3/ $\beta$ -actin. (B) Western blot of hApoC3 in media of McA-RH7777 cell with stable expression of shControl or shNcst, in the presence of Pitstop2. (C and D) *Ldlr* mRNA expression in livers from Cre- or *L-Ncst* mice (C) ( $n=6$  per group) and in McA-RH7777 cells expressing shControl or shNcst (D) ( $n=4$  per group). (E) Western blot of exogenous LDLR with either C-terminal GFP-tags in shControl or shNcst-stable McA-RH7777 cells. (F and G) *Pcsk9* mRNA expression in livers from Cre- or *L-Ncst* mice (F) ( $n=6$  per group) and control- or *Ncst* ASO-treated mice (G) ( $n=6-7$  per group). (H and I) Western blot of PCSK9 in media or cells from primary hepatocytes isolated from either Cre- or *L-Ncst* mice (H) and McA-RH7777 cells expressing shControl or shNcst (I). (J and K) *Idol* mRNA expression in livers from Cre- or *L-Ncst* mice (J) ( $n=6$  per group) or control- or *Ncst* ASO-treated mice (K) ( $n=6-7$  per group). (L) Schematic of LDLR with (full-length, FL) or without (dCTD) the C-terminal domain. \* $P < 0.05$  as compared to the indicated control by two-way ANOVA. All data are shown as the means  $\pm$  s.e.m.

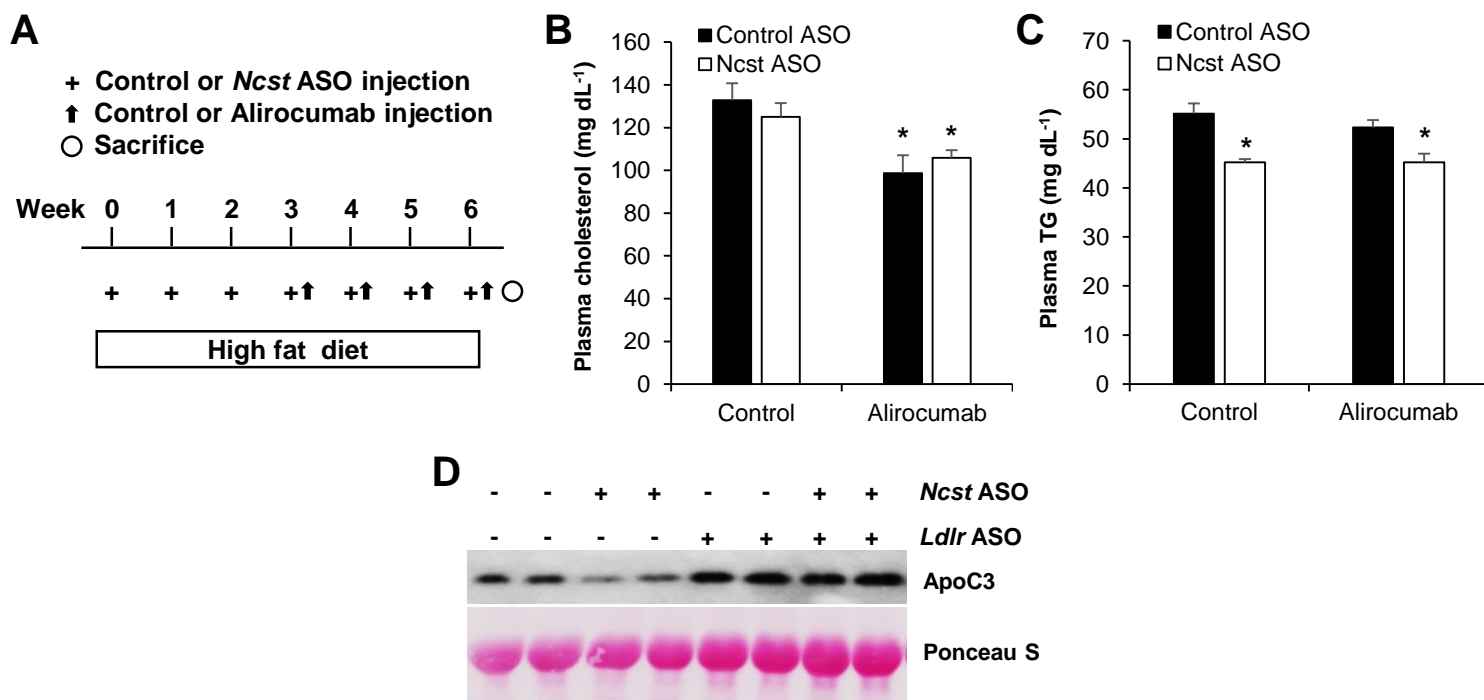

**Figure S6, related to Fig 6. *Ncst* ASO reduces plasma TG independent of PCSK9i and increases plasma ApoC3 levels.** (A-C) Experimental outline (A), plasma cholesterol (B) and TG (C) in HFD-fed C57BL/6 mice treated for 6 weeks with control or *Ncst* ASO, with or without alirocumab co-treatment (n=7 per group). (D) Plasma ApoC3 levels in mice injected with control, *Ncst* and/or *Ldlr* ASO. \* $P < 0.05$  as compared to the indicated control by two-way ANOVA. All data are shown as the means  $\pm$  s.e.m.
